# Supplementary material for: Two in one: switchable ion conductivity and white light emission integrated in an iodoplumbate-based twin chain hybrid crystal
Source: Royal Society of Chemistry journal article supplement (doi:10.1039/c5dt04594k), 2016-01-01
Supplement: c5dt04594k1.pdf [file c5dt04594k1.pdf]

# ESI

## Contents

Table S1 Crystal data and structural refinement of **1**

Table S2 Selected bond lengths (Å) and bond angles (°) in **1** at 296, 393 and 421 K

Table S3 Anisotropic and isotropic displacement parameters  $U_{ii}$  and  $U_{iso}$ (Å<sup>2</sup>) of **1** at 296K, 393K and 421K

Figure S1 Powder X-ray diffraction patterns at 298 K (experimental and simulated profiles) for as-prepared sample of **1** which confirms the phase purity of the as-prepared sample.

Figure S2 TGA curve for **1** (the measurements were performed under N<sub>2</sub> atmosphere) disclosed that **1** is thermally stable below 300 °C.

Figure S3 Complex impedance plots of **1** at selected temperatures (a) at 333, 343, 353, 363, 373 and 383 K (b) the enlarged one at 373 and 383 K.

Figure S4 Variation in dielectric constant permittivity of both real and imaginary parts with temperature for **1**.

Figure S5 H-bonding interactions between the cation and the inorganic double chain for **1** in LT phase (at 296 K).

Figure S6 The  $\pi\cdots\pi$  stacking between two adjacent pyridyl rings containing N(3) atom for **1** in HT phase (at 421 K).

Figure S7 Illustration for the relative orientation changes between neighbouring cations in a cation arrangement as well as within an anion chain in (a, b and c) LT phase (d, e and f) HT phase viewed along the inorganic chain direction.

Figure 8 Solid-state PL spectra of **1** at (a) 223 K (b) 173 K (c, d) 10 K under variation of excited light.

Table S1 Crystal data and structural refinement of **1**

| Temperature                       | 296 K                                                                         | 393 K                                               | 421 K                                               |
|-----------------------------------|-------------------------------------------------------------------------------|-----------------------------------------------------|-----------------------------------------------------|
| Chemical formula                  | C <sub>24</sub> H <sub>41</sub> I <sub>6</sub> N <sub>4</sub> Pb <sub>2</sub> |                                                     |                                                     |
| Wavelength (Å)                    | 0.71073                                                                       | 0.71073                                             | 0.71073                                             |
| CCDC numbers                      | 1026623                                                                       | 1026624                                             | 1026625                                             |
| Crystal system                    | orthorhombic                                                                  | orthorhombic                                        | triclinic                                           |
| Space group                       | <i>Pbcn</i>                                                                   | <i>Pbcn</i>                                         | <i>P</i> -1                                         |
| a (Å)                             | 20.7859(13)                                                                   | 21.089(3)                                           | 8.9573(17)                                          |
| b (Å)                             | 8.8243(6)                                                                     | 8.9287(11)                                          | 14.924(3)                                           |
| c (Å)                             | 42.787(3)                                                                     | 42.348(5)                                           | 15.212(3)                                           |
| α (°)                             | 90                                                                            | 90                                                  | 84.535(5)                                           |
| β (°)                             | 90                                                                            | 90                                                  | 86.831(5)                                           |
| γ (°)                             | 90                                                                            | 90                                                  | 89.177(5)                                           |
| V(Å <sup>3</sup> ) / Z            | 7848.0(9)/8                                                                   | 7974.0(18)/8                                        | 2021.1(7)/2                                         |
| Density (g·cm <sup>-3</sup> )     | 2.645                                                                         | 2.603                                               | 2.498                                               |
| Abs coeff. (mm <sup>-1</sup> )    | 13.309                                                                        | 13.099                                              | 12.917                                              |
| F(000)                            | 5568.0                                                                        | 5568.0                                              | 1308.0                                              |
| Data collect θ range              | 0.95-28.43                                                                    | 0.96-27.65                                          | 1.83-25.00                                          |
| Index range                       | -26 ≤ h ≤ 27<br>-11 ≤ k ≤ 11<br>-54 ≤ l ≤ 45                                  | -27 ≤ h ≤ 27<br>-11 ≤ k ≤ 10<br>-52 ≤ l ≤ 55        | -10 ≤ h ≤ 10<br>-17 ≤ k ≤ 17<br>-18 ≤ l ≤ 18        |
| Reflns collected                  | 9697                                                                          | 9246                                                | 6880                                                |
| Independent reflns                | 6322                                                                          | 4195                                                | 3383                                                |
| Data/restraints/parameters        | 9697/0/327                                                                    | 9246/0/327                                          | 6880/389/306                                        |
| Goodness-of-fit on F <sup>2</sup> | 1.069                                                                         | 1.006                                               | 0.953                                               |
| Final R indices [I > 2σ(I)]       | R <sub>1</sub> = 0.0489<br>wR <sub>2</sub> = 0.1021                           | R <sub>1</sub> = 0.0713<br>wR <sub>2</sub> = 0.1428 | R <sub>1</sub> = 0.0825<br>wR <sub>2</sub> = 0.1953 |

$$R_1 = \Sigma(|F_0| - |F_c|) / \Sigma|F_0|, wR_2 = \Sigma w(|F_0|^2 - |F_c|^2)^2 / \Sigma w(|F_0|^2)^2)^{1/2}$$

Table S2 Selected bond lengths (Å) and bond angles (°) in **1** at 296, 393 and 421 K

|                                                                                    | <b>1</b> (296 K) | <b>1</b> (393 K) | <b>1</b> (421 K) |            |
|------------------------------------------------------------------------------------|------------------|------------------|------------------|------------|
| 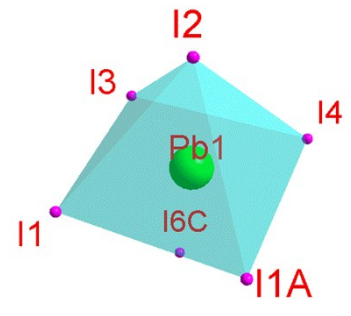  | Pb1-I1           | 3.2650(5)        | 3.2451(12)       | 3.4150(17) |
|                                                                                    | Pb1-I2           | 3.0477(9)        | 3.0279(13)       | 3.066(2)   |
|                                                                                    | Pb1-I3           | 3.1380(9)        | 3.2086(13)       | 3.023(2)   |
|                                                                                    | Pb1-I4           | 3.1712(8)        | 3.0801(15)       | 3.331(2)   |
|                                                                                    | Pb1-I6C          | 3.5167(9)        | 3.5530(8)        | -          |
|                                                                                    | I(2)-Pb(1)-I(3)  | 86.26(2)         | 89.20(4)         | 90.33(6)   |
|                                                                                    | I(2)-Pb(1)-I(4)  | 93.87(2)         | 91.18(4)         | 104.45(5)  |
|                                                                                    | I(3)-Pb(1)-I(4)  | 93.33(2)         | 91.27(4)         | 91.70(6)   |
|                                                                                    | I(3)-Pb(1)-I(1A) | 169.13(3)        | 177.46(4)        | 166.42(6)  |
|                                                                                    | I(2)-Pb(1)-I(1A) | 98.57(6)         | 102.79(3)        | 101.82(6)  |
|  | Pb2-I1B          | 3.5446(5)        | 3.4960(8)        | 3.6087(18) |
|                                                                                    | Pb2-I3B          | 3.0949(9)        | 3.1731(12)       | -          |
|                                                                                    | Pb2-I4           | 3.1955(8)        | 3.1376(15)       | 3.331(2)   |
|                                                                                    | Pb2-I5           | 3.0416(9)        | 3.0340(13)       | 3.1379(19) |
|                                                                                    | I(5)-Pb(2)-I(3B) | 88.77(2)         | 94.09(4)         | -          |
|                                                                                    | I(5)-Pb(2)-I(4)  | 90.89(2)         | 88.47(4)         | 90.31(6)   |
|                                                                                    | I(3B)-Pb(2)-I(4) | 89.83(2)         | 94.61(4)         | -          |
|                                                                                    | I(5)-Pb(2)-I(6)  | 88.31(2)         | 96.25(4)         | 102.72(6)  |
|                                                                                    | I(4)-Pb(2)-I(6)  | 176.49(2)        | 169.44(4)        | 175.85(6)  |

Table S3 Anisotropic and isotropic displacement parameters  $U_{ii}$  and  $U_{iso}(\text{\AA}^2)$  of **1** at 296K, 393K and 421K



| 1 at 296 K |           |             |           |             | 1 at 393 K |           |           |           |
|------------|-----------|-------------|-----------|-------------|------------|-----------|-----------|-----------|
| Atom       | $U_{11}$  | $U_{22}$    | $U_{33}$  | $U_{iso}$   | $U_{11}$   | $U_{22}$  | $U_{33}$  | $U_{iso}$ |
| Pb1        | 0.0419(2) | 0.03126(19) | 0.0355(2) | 0.03623(11) | 0.0636(5)  | 0.0491(3) | 0.0544(4) | 0.0557(2) |
| Pb2        | 0.0409(2) | 0.03223(19) | 0.0375(2) | 0.03688(11) | 0.0652(5)  | 0.0486(3) | 0.0505(4) | 0.0548(2) |
| I1         | 0.0593(5) | 0.0472(4)   | 0.0440(4) | 0.03688(11) | 0.0691(8)  | 0.0655(6) | 0.0597(7) | 0.0648(3) |
| I2         | 0.0614(5) | 0.0477(4)   | 0.0406(4) | 0.0499(2)   | 0.1074(11) | 0.0635(7) | 0.0680(8) | 0.0796(4) |
| I3         | 0.0525(5) | 0.0520(4)   | 0.0517(5) | 0.0521(2)   | 0.1072(11) | 0.0553(6) | 0.0827(9) | 0.0818(4) |
| I4         | 0.0704(5) | 0.0330(3)   | 0.0513(5) | 0.0516(2)   | 0.0870(10) | 0.0881(9) | 0.0852(9) | 0.0868(4) |
| I5         | 0.0641(5) | 0.0405(4)   | 0.0435(4) | 0.04939(19) | 0.1049(11) | 0.0787(7) | 0.0636(8) | 0.0824(4) |
| I6         | 0.0434(4) | 0.0413(4)   | 0.0406(4) | 0.04177(17) | 0.0929(10) | 0.0761(7) | 0.0643(8) | 0.0777(4) |
| N1         | 0.082(9)  | 0.074(8)    | 0.067(8)  | 0.074(3)    | 0.108(11)  | 0.096(10) | 0.091(10) | 0.098(5)  |
| N2         | 0.046(6)  | 0.042(5)    | 0.035(5)  | 0.041(2)    | 0.081(7)   | 0.075(6)  | 0.069(6)  | 0.075(3)  |
| N3         | 0.077(8)  | 0.056(6)    | 0.049(6)  | 0.061(3)    | 0.116(12)  | 0.127(11) | 0.104(11) | 0.116(5)  |
| N4         | 0.042(5)  | 0.033(4)    | 0.046(5)  | 0.040(2)    | 0.090(7)   | 0.087(6)  | 0.079(7)  | 0.085(3)  |

|     |           |           |           |            |           |           |           |           |
|-----|-----------|-----------|-----------|------------|-----------|-----------|-----------|-----------|
| C1  | 0.055(4)  | 0.050(4)  | 0.051(4)  | 0.0520(19) | 0.087(7)  | 0.076(7)  | 0.072(7)  | 0.078(3)  |
| C2  | 0.057(4)  | 0.053(4)  | 0.051(4)  | 0.054(2)   | 0.081(8)  | 0.071(7)  | 0.074(7)  | 0.075(4)  |
| C3  | 0.056(5)  | 0.052(4)  | 0.049(4)  | 0.052(2)   | 0.088(9)  | 0.078(7)  | 0.071(8)  | 0.079(4)  |
| C4  | 0.058(5)  | 0.045(4)  | 0.056(4)  | 0.053(2)   | 0.085(8)  | 0.068(7)  | 0.081(8)  | 0.078(4)  |
| C5  | 0.055(4)  | 0.051(4)  | 0.053(4)  | 0.0531(19) | 0.089(8)  | 0.085(7)  | 0.080(7)  | 0.085(3)  |
| C6  | 0.055(4)  | 0.053(4)  | 0.052(4)  | 0.054(2)   | 0.089(8)  | 0.086(7)  | 0.082(7)  | 0.086(4)  |
| C7  | 0.057(5)  | 0.061(4)  | 0.058(4)  | 0.058(2)   | 0.098(8)  | 0.113(8)  | 0.092(8)  | 0.101(4)  |
| C8  | 0.061(4)  | 0.066(4)  | 0.066(4)  | 0.064(2)   | 0.107(8)  | 0.124(8)  | 0.105(8)  | 0.112(4)  |
| C9  | 0.064(5)  | 0.074(5)  | 0.071(5)  | 0.070(3)   | 0.125(11) | 0.162(10) | 0.120(10) | 0.135(5)  |
| C10 | 0.080(6)  | 0.093(6)  | 0.082(6)  | 0.085(3)   | 0.136(11) | 0.176(11) | 0.130(11) | 0.147(5)  |
| C11 | 0.084(7)  | 0.107(7)  | 0.090(7)  | 0.094(3)   | 0.140(12) | 0.199(12) | 0.129(12) | 0.156(6)  |
| C12 | 0.096(9)  | 0.125(10) | 0.098(9)  | 0.106(5)   | 0.19(2)   | 0.26(2)   | 0.18(2)   | 0.211(10) |
| C13 | 0.053(4)  | 0.043(4)  | 0.050(4)  | 0.0488(18) | 0.094(8)  | 0.090(7)  | 0.079(7)  | 0.088(4)  |
| C14 | 0.054(4)  | 0.039(4)  | 0.049(4)  | 0.048(2)   | 0.093(8)  | 0.074(7)  | 0.086(8)  | 0.084(4)  |
| C15 | 0.052(5)  | 0.047(4)  | 0.047(4)  | 0.049(2)   | 0.093(9)  | 0.090(8)  | 0.079(8)  | 0.088(4)  |
| C16 | 0.053(4)  | 0.040(4)  | 0.051(4)  | 0.048(2)   | 0.095(8)  | 0.086(7)  | 0.073(8)  | 0.084(3)  |
| C17 | 0.051(4)  | 0.048(4)  | 0.052(4)  | 0.0507(19) | 0.092(8)  | 0.086(7)  | 0.087(7)  | 0.087(3)  |
| C18 | 0.054(4)  | 0.049(4)  | 0.052(4)  | 0.0516(19) | 0.096(8)  | 0.098(7)  | 0.087(7)  | 0.093(4)  |
| C19 | 0.054(4)) | 0.058(4)  | 0.058(4)  | 0.057(2)   | 0.103(8)  | 0.117(8)  | 0.098(8)  | 0.106(4)  |
| C20 | 0.064(4)  | 0.067(4)  | 0.066(4)  | 0.066(2)   | 0.107(8)  | 0.123(8)  | 0.107(8)  | 0.112(4)  |
| C21 | 0.075(6)  | 0.087(5)  | 0.078(5)  | 0.080(3)   | 0.113(10) | 0.139(9)  | 0.113(10) | 0.122(5)  |
| C22 | 0.091(6)  | 0.107(6)  | 0.095(6)  | 0.098(3)   | 0.133(11) | 0.162(10) | 0.130(10) | 0.142(5)  |
| C23 | 0.091(7)  | 0.121(7)  | 0.098(7)  | 0.103(4)   | 0.136(12) | 0.185(12) | 0.141(12) | 0.154(6)  |
| C24 | 0.115(10) | 0.136(10) | 0.115(10) | 0.122(5)   | 0.19(2)   | 0.26(2)   | 0.19(2)   | 0.217(11) |

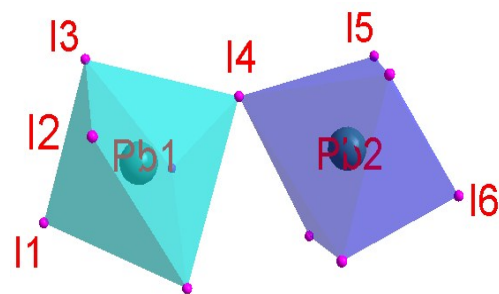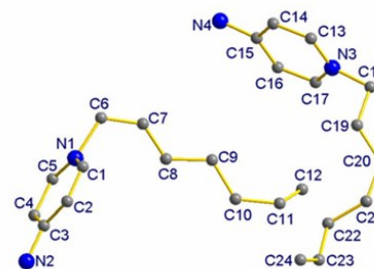

| 1 at 393 K |                 |                 |                 |                  | 1 at 421 K      |                 |                 |                  |
|------------|-----------------|-----------------|-----------------|------------------|-----------------|-----------------|-----------------|------------------|
| Atom       | U <sub>11</sub> | U <sub>22</sub> | U <sub>33</sub> | U <sub>iso</sub> | U <sub>11</sub> | U <sub>22</sub> | U <sub>33</sub> | U <sub>iso</sub> |
| Pb1        | 0.0636(5)       | 0.0491(3)       | 0.0544(4)       | 0.0557(2)        | 0.0552(4)       | 0.0719(5)       | 0.0568(5)       | 0.0618(2)        |
| Pb2        | 0.0652(5)       | 0.0486(3)       | 0.0505(4)       | 0.0548(2)        | 0.0582(4)       | 0.0670(5)       | 0.0742(6)       | 0.0668(3)        |
| I1         | 0.0691(8)       | 0.0655(6)       | 0.0597(7)       | 0.0648(3)        | 0.0798(9)       | 0.0751(9)       | 0.0600(8)       | 0.0719(4)        |
| I2         | 0.1074(11)      | 0.0635(7)       | 0.0680(8)       | 0.0796(4)        | 0.1155(13)      | 0.0828(11)      | 0.0912(11)      | 0.0970(5)        |
| I3         | 0.1072(11)      | 0.0553(6)       | 0.0827(9)       | 0.0818(4)        | 0.0798(10)      | 0.1723(17)      | 0.0688(10)      | 0.1097(6)        |
| I4         | 0.0870(10)      | 0.0881(9)       | 0.0852(9)       | 0.0868(4)        | 0.0877(10)      | 0.0873(11)      | 0.1271(14)      | 0.0995(6)        |
| I5         | 0.1049(11)      | 0.0787(7)       | 0.0636(8)       | 0.0824(4)        | 0.0799(10)      | 0.1395(14)      | 0.0772(10)      | 0.0986(5)        |
| I6         | 0.0929(10)      | 0.0761(7)       | 0.0643(8)       | 0.0777(4)        | 0.0950(12)      | 0.0827(11)      | 0.1672(18)      | 0.1181(7)        |
| N1         | 0.108(11)       | 0.096(10)       | 0.091(10)       | 0.098(5)         | 0.132(18)       | 0.108(15)       | 0.054(12)       | 0.100(7)         |
| N2         | 0.081(7)        | 0.075(6)        | 0.069(6)        | 0.075(3)         | 0.106(15)       | 0.19(2)         | 0.070(13)       | 0.122(8)         |
| N3         | 0.116(12)       | 0.127(11)       | 0.104(11)       | 0.116(5)         | 0.094(13)       | 0.074(12)       | 0.095(14)       | 0.089(6)         |
| N4         | 0.090(7)        | 0.087(6)        | 0.079(7)        | 0.085(3)         | 0.16(2)         | 0.079(14)       | 0.17(2)         | 0.137(9)         |
| C1         | 0.087(7)        | 0.076(7)        | 0.072(7)        | 0.078(3)         | 0.085(17)       | 0.11(2)         | 0.11(2)         | 0.106(9)         |
| C2         | 0.081(8)        | 0.071(7)        | 0.074(7)        | 0.075(4)         | 0.039(10)       | 0.14(2)         | 0.061(14)       | 0.080(7)         |

|     |           |           |           |           |            |            |            |            |
|-----|-----------|-----------|-----------|-----------|------------|------------|------------|------------|
| C3  | 0.088(9)  | 0.078(7)  | 0.071(8)  | 0.079(4)  | 0.080(15)  | 0.084(15)  | 0.073(15)  | 0.079(6)   |
| C4  | 0.085(8)  | 0.068(7)  | 0.081(8)  | 0.078(4)  | 0.110(17)  | 0.114(18)  | 0.049(13)  | 0.091(7)   |
| C5  | 0.089(8)  | 0.085(7)  | 0.080(7)  | 0.085(3)  | 0.080(16)  | 0.109(19)  | 0.12(2)    | 0.102(9)   |
| C6  | 0.089(8)  | 0.086(7)  | 0.082(7)  | 0.086(4)  | 0.12(2)    | 0.17(3)    | 0.075(18)  | 0.124(10)  |
| C7  | 0.098(8)  | 0.113(8)  | 0.092(8)  | 0.101(4)  | 0.25(4)    | 0.33(5)    | 0.13(3)    | 0.23(2)    |
| C8  | 0.107(8)  | 0.124(8)  | 0.105(8)  | 0.112(4)  | 0.62(13)   | 0.50(9)    | 0.13(4)    | 0.42(5)    |
| C9  | 0.125(11) | 0.162(10) | 0.120(10) | 0.135(5)  | 0.22(4)    | 1.67(4)    | 0.14(4)    | 0.67(2)    |
| C10 | 0.136(11) | 0.176(11) | 0.130(11) | 0.147(5)  | 0.36(9)    | 1.39(13)   | 0.24(6)    | 0.64(5)    |
| C11 | 0.140(12) | 0.199(12) | 0.129(12) | 0.156(6)  | 0.43(12)   | 0.60(13)   | 0.40(9)    | 0.46(6)    |
| C12 | 0.19(2)   | 0.26(2)   | 0.18(2)   | 0.211(10) | 0.11(3)    | 0.27(6)    | 0.88(18)   | 0.42(6)    |
| C13 | 0.094(8)  | 0.090(7)  | 0.079(7)  | 0.088(4)  | 0.098(2)   | 0.098(2)   | 0.098(2)   | 0.0979(19) |
| C14 | 0.093(8)  | 0.074(7)  | 0.086(8)  | 0.084(4)  | 0.1146(14) | 0.1145(15) | 0.1146(15) | 0.1145(14) |
| C15 | 0.093(9)  | 0.090(8)  | 0.079(8)  | 0.088(4)  | 0.097(2)   | 0.097(2)   | 0.097(2)   | 0.0974(19) |
| C16 | 0.095(8)  | 0.086(7)  | 0.073(8)  | 0.084(3)  | 0.096(18)  | 0.109(19)  | 0.11(2)    | 0.104(8)   |
| C17 | 0.092(8)  | 0.086(7)  | 0.087(7)  | 0.087(3)  | 0.081(15)  | 0.054(13)  | 0.13(2)    | 0.089(7)   |
| C18 | 0.096(8)  | 0.098(7)  | 0.087(7)  | 0.093(4)  | 0.11(2)    | 0.14(2)    | 0.13(2)    | 0.127(10)  |
| C19 | 0.103(8)  | 0.117(8)  | 0.098(8)  | 0.106(4)  | 0.34(6)    | 0.16(3)    | 0.18(4)    | 0.23(2)    |
| C20 | 0.107(8)  | 0.123(8)  | 0.107(8)  | 0.112(4)  | 0.19(5)    | 0.74(14)   | 0.30(4)    | 0.42(5)    |
| C21 | 0.113(10) | 0.139(9)  | 0.113(10) | 0.122(5)  | 0.41(8)    | 0.45(8)    | 0.24(4)    | 0.38(4)    |
| C22 | 0.133(11) | 0.162(10) | 0.130(10) | 0.142(5)  | 0.21(6)    | 0.10(3)    | 1.0(2)     | 0.46(7)    |
| C23 | 0.136(12) | 0.185(12) | 0.141(12) | 0.154(6)  | 0.32(6)    | 0.17(4)    | 0.25(5)    | 0.24(2)    |
| C24 | 0.19(2)   | 0.26(2)   | 0.19(2)   | 0.217(11) | 0.27(6)    | 0.26(6)    | 0.27(6)    | 0.27(3)    |

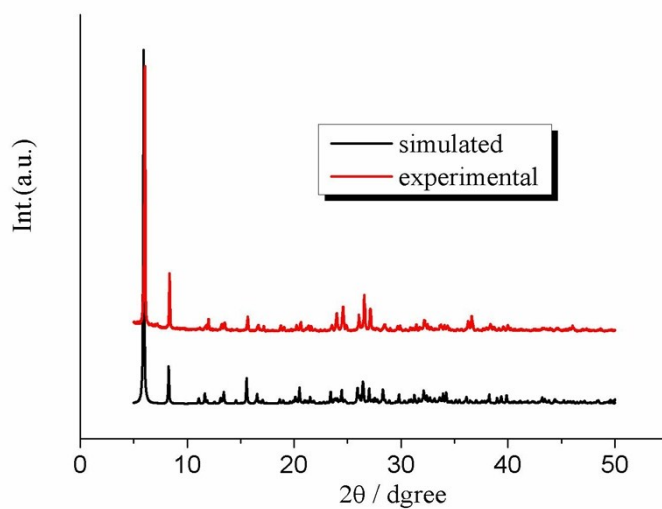

Figure S1 Powder X-ray diffraction patterns at 298 K (experimental and simulated profiles) for as-prepared sample of **1** which confirms the phase purity of the as-prepared sample.

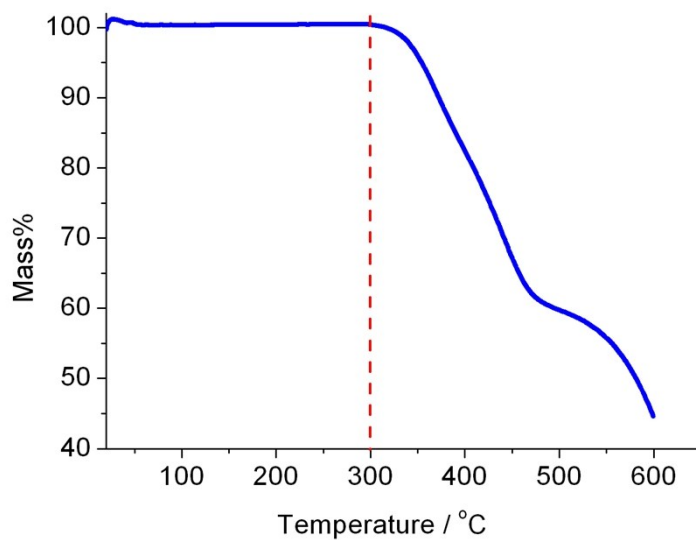

Figure S2 TGA curve for **1** (the measurements were performed under N<sub>2</sub> atmosphere) disclosed that **1** is thermally stable below 300 °C.



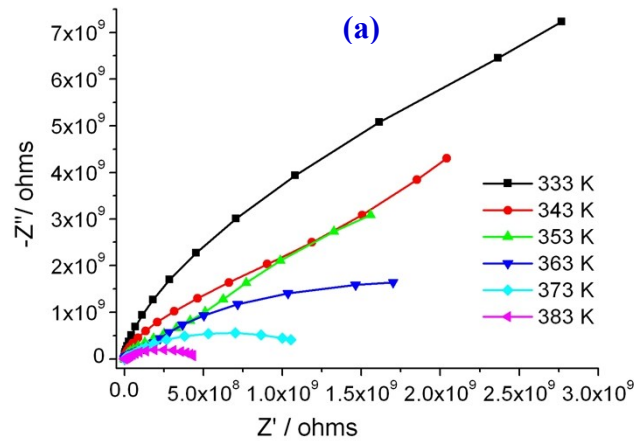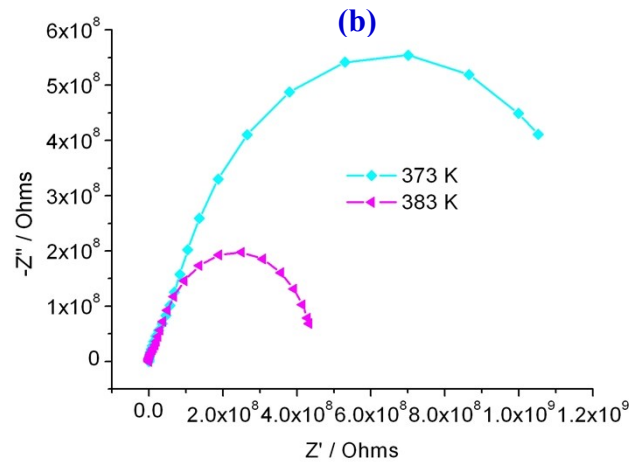

Figure S3 Complex impedance plots of **1** at selected temperatures (a) at 333, 343, 353, 363, 373 and 383 K (b) the enlarged one at 373 and 383 K.

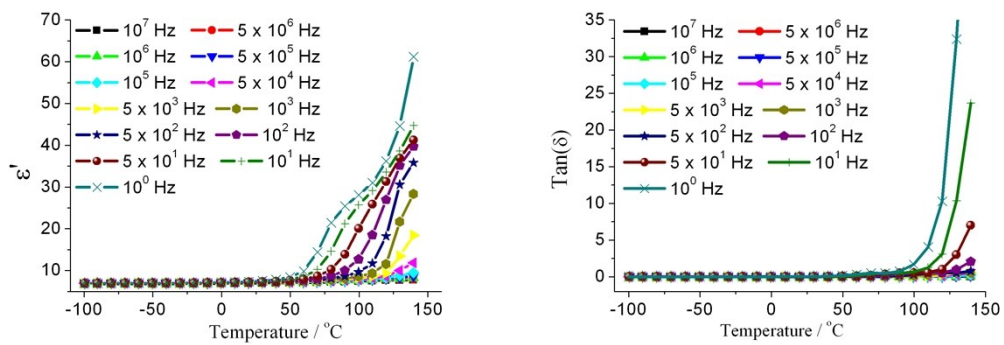

Figure S4 Variation in dielectric constant permittivity of both real and imaginary parts with temperature for **1**.

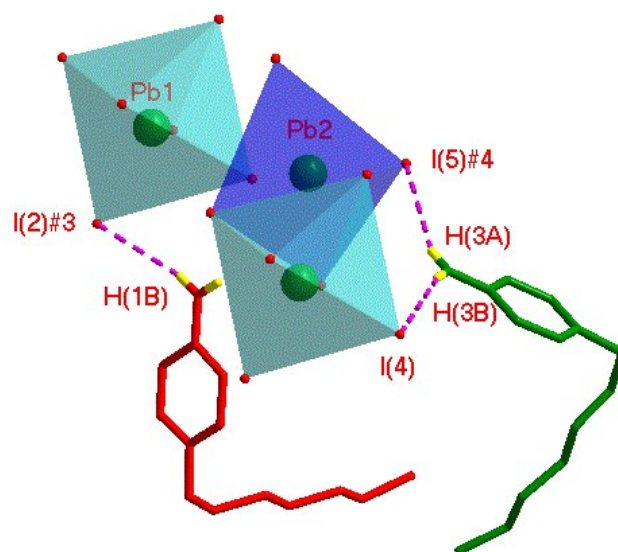

Figure S5 H-bonding interactions between the cation and the inorganic double chain for **1** in LT phase (at 296 K).

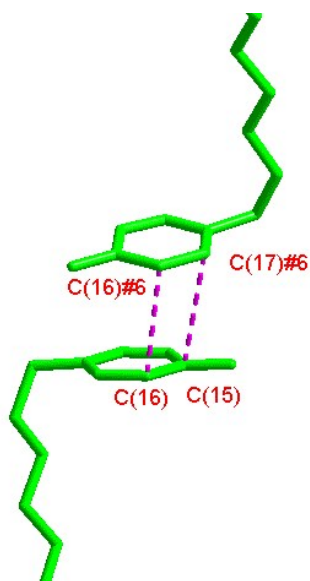

Figure S6 The  $\pi$ ... $\pi$  stacking between two adjacent pyridyl rings containing N(3) atom for **1** in HT phase (at 421 K).

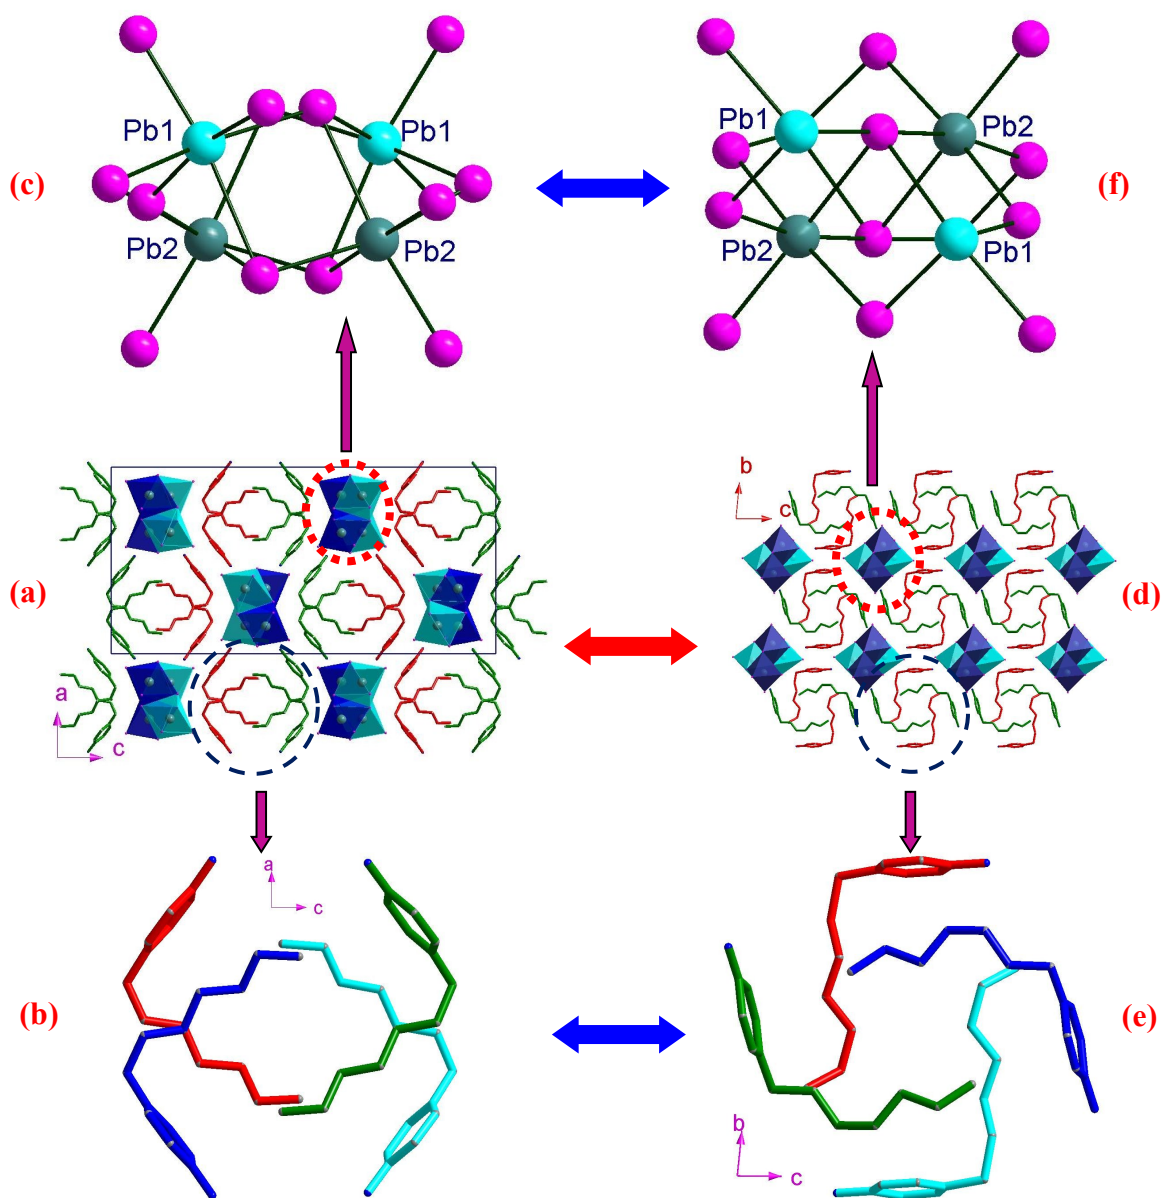

Figure S7 Illustration for the relative orientation changes between neighbouring cations in a cation arrangement as well as within an anion chain in (a, b and c) LT phase (d, e and f) HT phase viewed along the inorganic chain direction.

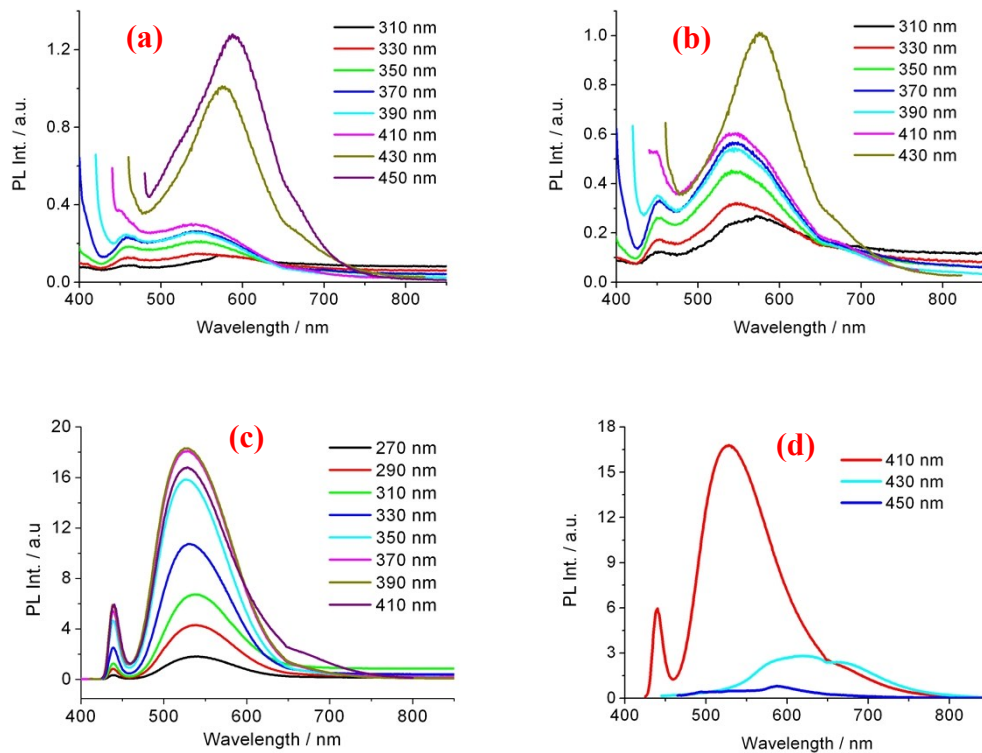

Figure 8 Solid-state PL spectra of **1** at (a) 223 K (b) 173 K (c, d) 10 K under variation of excited light.
